# 1 **Variable prediction accuracy of polygenic scores within an ancestry** 2 **group**

3  
4 Hakhamanesh Mostafavi<sup>\*,+,1</sup>, Arbel Harpak<sup>\*,+,1</sup>, Dalton Conley<sup>2,3</sup>, Jonathan K Pritchard<sup>4,5</sup> and  
5 Molly Przeworski<sup>+,1,6</sup>

6  
7 <sup>1</sup> Department of Biological Sciences, Columbia University

8 <sup>2</sup> Department of Sociology, Princeton University

9 <sup>3</sup> Office of Population Research, Princeton University

10 <sup>4</sup> Departments of Genetics and Biology

11 <sup>5</sup> Howard Hughes Medical Institute, Stanford University

12 <sup>6</sup> Department of Systems Biology, Columbia University

13 \* These authors contributed equally

14 + To whom correspondence should be addressed: [hsm2137@columbia.edu](mailto:hsm2137@columbia.edu),

15 [ah3586@columbia.edu](mailto:ah3586@columbia.edu) or [mp3284@columbia.edu](mailto:mp3284@columbia.edu)

## 17 **Abstract**

18  
19 Fields as diverse as human genetics and sociology are increasingly using polygenic scores based  
20 on genome-wide association studies (GWAS) for phenotypic prediction. However, recent work has  
21 shown that polygenic scores have limited portability across groups of different genetic ancestries,  
22 restricting the contexts in which they can be used reliably and potentially creating serious  
23 inequities in future clinical applications. Using the UK Biobank data, we demonstrate that even  
24 within a single ancestry group, the prediction accuracy of polygenic scores depends on  
25 characteristics such as the age or sex composition of the individuals in which the GWAS and the  
26 prediction were conducted, and on the GWAS study design. Our findings highlight both the  
27 complexities of interpreting polygenic scores and underappreciated obstacles to their broad use.

28

29

30

## 31 **Introduction**

32

33 Genome-wide association studies (GWAS) have now been conducted for thousands of human  
34 complex traits, revealing that the genetic architecture is almost always highly polygenic, i.e., that  
35 the bulk of the heritable variation is due to thousands of genetic variants, each with tiny marginal  
36 effects (Boyle, Li, and Pritchard 2017; Bulik-Sullivan et al. 2015). These findings often make it  
37 difficult to interpret the molecular basis for variation in a trait, but they lend themselves more  
38 immediately to another use: phenotypic prediction. Under the assumption that alleles act  
39 additively, a “polygenic score” (PGS) can be created by summing the effects of the alleles carried  
40 by an individual; this score can then be used to predict that individual’s phenotype (Lynch and  
41 Walsh 1998; Gibson 2008; Kathiresan et al. 2008). For highly heritable traits, such scores already  
42 provide informative predictions in some contexts: for example, prediction accuracies are 24.4%  
43 for height (Yengo et al. 2018) and up to 13% for educational attainment (Lee et al. 2018).

44

45 This genomic approach to phenotypic prediction has been rapidly adopted in three distinct fields.  
46 In human genetics, PGS have been shown to help identify individuals that are more likely to be at  
47 risk of diseases such as breast cancer (e.g., Khera et al. 2018; Inouye et al. 2018; Mavaddat et al.  
48 2019; Khera et al. 2019). Based on these findings, a number of papers have advocated that PGS  
49 be adopted in designing clinical studies, and by clinicians as additional risk factors to consider in  
50 treating patients (Khera et al. 2018; Torkamani, Wineinger, and Topol 2018). In human  
51 evolutionary genetics, several lines of evidence suggest that adaptation may often take the form of  
52 shifts in the optimum of a polygenic phenotype and hence act jointly on the many variants that  
53 influence the phenotype (Pritchard and Di Rienzo 2010; Berg and Coop 2014; Hoellinger,  
54 Pennings, and Hermisson 2019). In this context, PGS are used to examine the evolutionary history  
55 of the set of alleles known to impact a complex trait of interest, e.g., height (Berg and Coop 2014;  
56 Field et al. 2016; Berg et al. 2019; Uricchio et al. 2019; Edge and Coop 2019; Speidel et al. 2019).  
57 Finally, in various disciplines of the social sciences, PGS are increasingly used to distinguish  
58 environmental from genetic sources of variability (Conley 2016), as well as to understand how  
59 genetic variation among individuals may cause heterogeneous treatment effects when studying  
60 how an environmental influence (e.g., a schooling reform) affects an outcome (such as BMI)  
61 (Barcellos, Carvalho, and Turley 2018; Davies et al. 2018). In these applications, the premise is

62 that PGS will “port” well across groups—that is that they remain predictive not only in samples  
63 very similar to the ones in which the GWAS was conducted, but also in other sets of individuals  
64 (henceforth “prediction sets”).

65  
66 As recent papers have highlighted, however, PGS are not as predictive in individuals whose genetic  
67 ancestry differs substantially from the ancestry of individuals in the original GWAS (reviewed in  
68 Martin et al. 2019). As one illustration, PGS calculated in the UK Biobank predict phenotypes of  
69 individuals sampled in the UK Biobank better than those of individuals sampled in the BioBank  
70 Japan Project: for instance, the incremental  $R^2$  for height is approximately 11% in the UK versus  
71 3% in Japan (Martin et al. 2019). Similarly, using PGS based on Europeans and European-  
72 Americans, the largest educational attainment GWAS to date (“EA3”) reported an incremental  $R^2$   
73 of 10.6% for European-Americans but only 1.6% for African-Americans (Lee et al. 2018).

74  
75 To date, such observations have been discussed mainly in terms of population genetic factors that  
76 reduce portability (Martin et al. 2017, 2019; Kim et al. 2018; Duncan et al. 2018; Francisco and  
77 Bustamante 2018; Sirugo, Williams, and Tishkoff 2019). Notably, GWAS does not pinpoint causal  
78 variants, but instead implicates a set of possible causal variants that lie in close physical proximity  
79 in the genome. The estimated effect of a given SNP depends on the extent of linkage disequilibrium  
80 (LD) with the causal sites (Pritchard and Przeworski 2001; Bulik-Sullivan et al. 2015). Thus, LD  
81 differences between populations that arose from their distinct demographic and recombination  
82 histories will lead to variation in the prediction accuracy of phenotypes across populations  
83 (Rosenberg et al. 2018). Because of their distinct demographic histories, populations also differ in  
84 the allele frequencies of causal variants. This problem is particularly acute for alleles that are rare  
85 in the population in which the GWAS was conducted but common in the population in which the  
86 trait is being predicted. Such variants are likely to have noisy effect size estimates in the estimation  
87 sample or may not be included in the PGS at all, and yet they contribute substantially to heritability  
88 in the target population. Furthermore, causal loci or effect sizes may differ among populations, for  
89 instance if the effect of an allele depends on the genetic background on which it arises (e.g.,  
90 Adhikari et al. 2019). For all these reasons, we should expect PGS to be less predictive across  
91 ancestries.

92

93 In practice, given that most individuals (79%) included in current GWAS are of European ancestry  
94 (Popejoy and Fullerton 2016; Martin et al. 2019), PGS are systematically more predictive in  
95 European-ancestry individuals than among other people. As a consequence, the clinical  
96 applications and scientific understanding to be gained from PGS will predominantly and unfairly  
97 benefit a small subset of humanity. A number of papers have therefore highlighted the importance  
98 of expanding GWAS efforts to include more diverse ancestries (Martin et al. 2018, 2019; Wojcik  
99 et al. 2018; Sirugo, Williams, and Tishkoff 2019).

100

101 Importantly, factors other than ancestry could also impact the accuracy and portability of PGS. For  
102 example, the educational attainment of an individual depends not only on their own genotype, but  
103 on the genotypes of their parents, due to nurturing effects (Kong et al. 2018), and of their peers,  
104 due to social genetic effects (Domingue et al. 2018), as well as of course on non-genetic factors.  
105 Also, traits such as height and educational attainment show strong patterns of assortative mating,  
106 which can distort estimated effect sizes in GWAS (Domingue et al. 2014; Robinson et al. 2017;  
107 Ruby et al. 2018). To what extent these effects remain the same across cultures and environments  
108 is unknown, but if they differ, so will the prediction accuracy. More generally, while we still know  
109 little about GxE (genotype-environment interactions) in humans, GxE effects are well-documented  
110 in other species—notably in experimental settings—and would further reduce the portability of  
111 PGS across environments (Lynch and Walsh 1998; Gibson 2008). In addition, environmental  
112 variance could differ between groups, which would change the proportion of the variance in the  
113 trait explained by a PGS (i.e., the prediction accuracy) even in the absence of genetic differences  
114 or GxE effects. Finally, PGS for some traits may include a component of environmental or cultural  
115 confounding associated with population structure (Berg et al. 2019; Sohail et al. 2019; Haworth et  
116 al. 2019; Lawson et al. 2019). This source of confounding can increase or decrease prediction  
117 accuracy, depending on the structure in the prediction samples.

118

119 Given these considerations, it is important to ask to what extent PGS are portable among groups  
120 within the same ancestry. To explore this question, we stratified the subset of UK Biobank samples  
121 designated as “White British” (WB) according to some of the standard sample characteristics of  
122 GWAS studies: the ages of the individuals, their sex, and socio-economic status. We chose to focus  
123 on these particular characteristics because they vary widely among GWAS samples depending on

124 sample ascertainment procedures. Furthermore, these characteristics have been shown to influence  
125 heritability for some traits in a study of a subset of the UK Biobank (Ge et al. 2017), raising the  
126 possibility that these choices also influence prediction accuracy. Indeed, for three example traits,  
127 we show that there exist major differences in the prediction accuracy of the PGS among these  
128 groups, even though they share highly similar genetic ancestries. For a variety of traits, we further  
129 demonstrate that prediction accuracy differs markedly depending on whether the GWAS is  
130 conducted in unrelated individuals or in pairs of siblings, even when controlling for the precision  
131 of the estimates. This finding is again unexpected under standard GWAS assumptions; it  
132 underscores the importance of genetic effects that are included in estimates from some study  
133 designs and not others and highlights underappreciated challenges with GWAS-based phenotypic  
134 prediction.

135

136 At present, it is difficult to fully determine the reasons why we see such variable prediction  
137 accuracy across these strata and study designs. Contributing factors probably include indirect  
138 genetic effects from relatives, assortative mating, varying levels of environmental variance, GxE  
139 interaction effects and perhaps undetected environmental confounding. Nonetheless, our results  
140 make clear that the prediction accuracy of PGS can be affected in unpredictable ways by known—  
141 and presumably unknown—factors in addition to genetic ancestry.

142

## 143 **Results**

144

### 145 **Sample characteristics of the GWAS and prediction set can influence prediction accuracy** 146 **even within a single ancestry**

147 We examined how PGS for a few example traits port across samples that are of similar genetic  
148 ancestry but differ in terms of some common study characteristics, e.g., the male:female ratio  
149 (henceforth “sex ratio”), age distribution, or socio-economic status (SES). To this end, we limited  
150 our analysis to the largest subset of individuals in the UKB with a relatively homogeneous  
151 ancestry: 337,536 unrelated individuals that were characterized by the UKB as “White British”  
152 (WB) (Bycroft et al. 2017). In all analyses, we further adjusted for the first 20 principal  
153 components of the genotype data, to account for any population structure within this set of  
154 individuals (**Materials and Methods**).

155

156 In all analyses, we randomly selected a subset of individuals to be the prediction set; we then  
157 conducted GWAS using the remaining individuals and built a PGS model by LD-based clumping  
158 of the associations (**Materials and Methods**). To examine the reliability of the prediction, we  
159 considered the incremental  $R^2$ , i.e., the  $R^2$  increment obtained when adding the PGS to a model  
160 with only covariates (referred to as “prediction accuracy” henceforth). Whether this measure is  
161 appropriate depends on how PGS are to be used; it is not an obvious choice in human genetics,  
162 where the goal is often to identify individuals at high risk of developing a particular disease (i.e.,  
163 in the tail of the polygenic score distribution). Nonetheless, because it has been widely reported in  
164 discussions of portability across genetic ancestries (e.g., Lee et al. 2018; Martin et al. 2019), we  
165 also used it here.

166

167 As a first case, we considered the prediction accuracy of a PGS for diastolic blood pressure in  
168 prediction sets stratified by sex, motivated by reports that variation in this trait may arise for  
169 somewhat distinct reasons in the two sexes (Reckelhoff 2001; Zhou et al. 2017). We randomly  
170 selected males and females as prediction sets (20K individuals each), and used the rest of the  
171 individuals for GWAS, matching the numbers of females and males in the GWAS set. Adjusting  
172 for mean sex effects and medication use (see **Materials and Methods**), the prediction accuracy is  
173 about 1.31-fold higher for females than for males (Mann-Whitney  $p = 1.4 \cdot 10^{-11}$ ; **Fig. 1A**). Thus,  
174 despite equal representation of males and females in the GWAS set, the prediction accuracy varies  
175 depending on the sex ratio of prediction samples. To examine this further, we repeated the same  
176 analysis but performed the GWAS in only one sex. When the GWAS is conducted only in females,  
177 the prediction accuracy is about 1.43-fold higher for females than for males; in turn, when GWAS  
178 was done in only males, the prediction accuracy in both sexes is similar, as well as somewhat  
179 decreased (**Fig. 1B**).

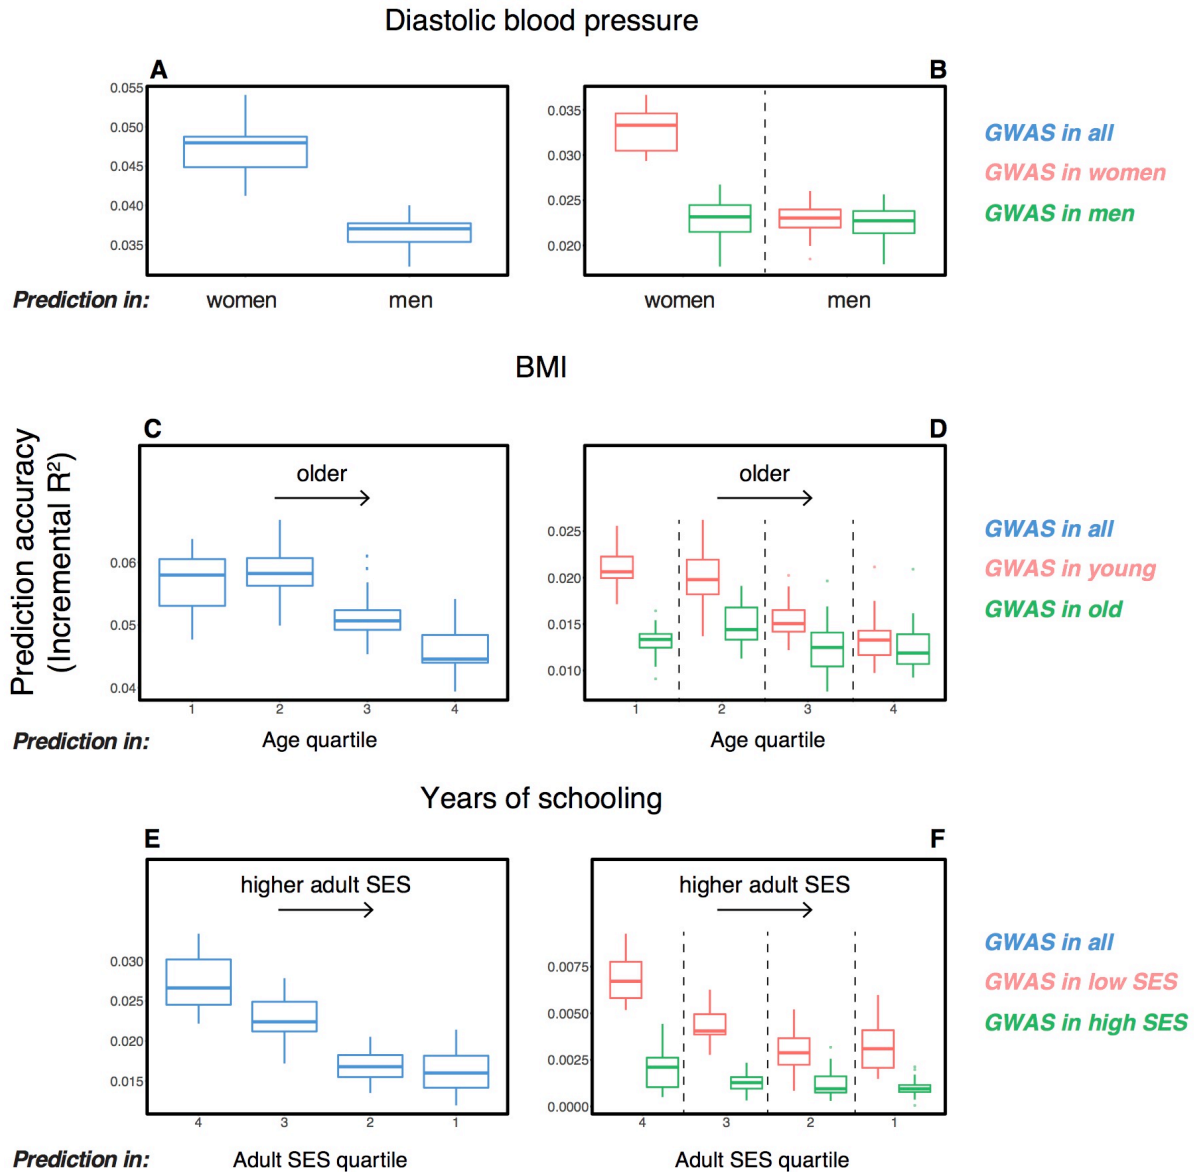

180

181 **Figure 1: Variable prediction accuracy of polygenic scores within an ancestry group.** Shown are incremental  $R^2$  values (i.e.,  
182 the increment in  $R^2$  obtained by adding a polygenic score predictor to a model with covariates alone) in different prediction sets.  
183 Each box and whiskers plot is computed based on twenty choices of estimation and prediction sets. Thick horizontal lines denote  
184 the medians (A,C,E). The polygenic scores were estimated in large samples of unrelated WB individuals. Phenotypes were then  
185 predicted in distinct samples of unrelated WB individuals, stratified by sex (A), age (C) or Townsend deprivation index, a measure  
186 of SES (E). (B,D,F) Same as in A,C,E, but here the polygenic scores are based on a GWAS in a sample limited to one sex, age or  
187 SES group. When the GWAS is performed in the group that showed higher prediction accuracy in A,C,E (women, young, low  
188 SES), the qualitative trend is the same; but when the GWAS is performed in men, old or high SES, prediction accuracy is diminished  
189 and similar across groups.

190

191 We then considered two other cases, evaluating prediction accuracy in groups stratified by age for  
192 BMI<sup>1</sup> and by adult socio-economic status (SES) for years of schooling, using the Townsend  
193 deprivation index as a measure; our choices were motivated by prior evidence suggesting that these  
194 characteristics of the GWAS can influence heritability (Branigan, McCallum, and Freese 2013;  
195 Conley et al. 2015; Belsky et al. 2018; Ge et al. 2017; Elks et al. 2012). We withheld a random set  
196 of 10K individuals in each quartile of age and SES for prediction and performed GWAS using the  
197 remaining individuals, matching the sample sizes across quartiles in the GWAS set. Similar to our  
198 observation for diastolic blood pressure, the prediction accuracy varies across prediction sets: it is  
199 1.25-fold higher for BMI in the youngest quartile compared to the oldest (Mann-Whitney  $p = 1.7 \cdot$   
200  $10^{-8}$ ; **Fig. 1C**), and 1.69-fold higher for years of schooling in the lowest SES quartile compared  
201 to the highest (Mann-Whitney  $p = 1.4 \cdot 10^{-11}$ ; **Fig. 1E**). Furthermore, the differences across  
202 groups are again sensitive to the choice of the GWAS set: the differences are marked when GWAS  
203 is restricted to the youngest quartile for BMI and the lowest SES quartile for years of schooling,  
204 but diminished when the GWAS is performed in the oldest and the highest SES quartiles for BMI  
205 and years of schooling, respectively (**Figs. 1D,F**). These results remained qualitatively unchanged  
206 when we used  $R^2$  instead of incremental  $R^2$  to measure prediction accuracy (**Fig. S1**).

207  
208 In these analyses, we used a p-value threshold of  $10^{-4}$  for inclusion of a SNP in the PGS. The  
209 choice of how stringent to make the GWAS p-value threshold is important but somewhat arbitrary,  
210 with approaches ranging from requiring genome-wide significance to including all SNPs (Weedon  
211 et al. 2008; Pharoah et al. 2008; Euesden, Lewis, and O'reilly 2014; Vilhjálmsón et al. 2015; Ware  
212 et al. 2017; Mostafavi et al. 2017; Speidel et al. 2019). Often, this threshold is chosen to maximize  
213 prediction accuracy in an independent validation set. When the goal is to compare prediction  
214 performance across different groups, there is no obvious optimal choice of the p-value threshold<sup>2</sup>.  
215 As we show, however, the qualitative trends reported in **Fig. 1** do not depend on the p-value  
216 threshold choice (**Fig. S2**).

217

---

<sup>1</sup> Since the UK Biobank participants were enrolled within about a five-year span, differences in age could in principle also be reflective of cohort effects.

<sup>2</sup> The optimal p-value in this context will differ across studies, as it depends not only on the genetic architecture and heritability of the trait, but also on the GWAS sample size, i.e., power (Dudbridge 2013).



218 These results pertain to three exemplar traits and do not speak to the prevalence of this  
219 phenomenon. Nonetheless, they demonstrate that the portability of a polygenic score can vary  
220 markedly depending on sample characteristics of both the original GWAS and the prediction set,  
221 even within a single ancestry, and that the variation in prediction accuracy across strata can be  
222 substantial; in fact, on the same order as reported for different continental ancestries within the UK  
223 Biobank (Martin et al. 2019). As one example, the prediction accuracy in East Asian samples,  
224 averaged across a number of traits, is about half of that in European samples when GWAS was  
225 European-based; when the GWAS is done in the lowest SES group for years of schooling,  
226 prediction accuracy in the highest SES group is less than half of that in the lowest SES (**Fig. 1F**).  
227 Moreover, whereas for these traits, we had prior information about which characteristics may be  
228 relevant, other aspects that vary across sets of individuals are undoubtedly important as well (e.g.,  
229 smoking behavior may modify genetic effects on lipid traits; Bentley et al. 2019), and for any  
230 given trait of interest, much less may be known *a priori*.

231

### 232 **Possible explanations for the variable prediction accuracy**

233 Our goal in this paper is to highlight that prediction accuracies can vary across groups of highly  
234 similar ancestry, rather than to investigate the likely causes for any particular phenotype.  
235 Nonetheless, it is worth noting a couple of possibilities. Perhaps the simplest explanation for our  
236 findings is that prediction accuracies vary only because of differences in the extent of  
237 environmental variance, while the genetic variance is more or less constant. Indeed, the SNP  
238 heritabilities vary markedly across strata (see also Ge et al. 2017), and the prediction accuracies  
239 track heritability differences (**Fig. 2A,B,C**). For all three traits, however, the estimated SNP  
240 heritability increases or remains the same with increasing phenotypic variance, in contrast to what  
241 would be expected under a model with a fixed genetic variance across strata (**Fig. 2D,E,F**).

242

243 Another possibility is that there is an interaction between genetic effects and sample  
244 characteristics, for instance that different sets of genetic variants contribute to blood pressure levels  
245 in males and females or to BMI across different stages of life<sup>3</sup>. This explanation is not supported

---

<sup>3</sup> Although such interactions could in some contexts be thought of as reflecting GxE, we use the term sample characteristic rather than “environment”, as environment has different meaning across disciplines, referring in some contexts only to factors that are “exogenous” to genetics. Viewed in this lens, SES in adulthood cannot be interpreted as exogenous, because it is in part determined by educational achievement, which is itself influenced by genetic factors, and similarly it is questionable whether age or sex are environments.

246 by bivariate LD-score regression, which indicates that the genetic correlations across strata are  
247 close to 1 (**Table S2; Materials and Methods**). Yet when we re-estimate individual SNP effects  
248 in the prediction sets for SNPs ascertained in the original GWAS, the estimated effects of trait-  
249 increasing alleles are larger in the groups with higher prediction accuracy (**Fig. S3; Materials and**  
250 **Methods**). A possible way to reconcile these findings is if effect sizes are highly correlated but  
251 systematically larger in the groups with higher prediction accuracy.

252

253 Other factors complicate interpretation, however, and may also contribute to our observations. In  
254 particular, for the case of educational attainment, conditioning on adult SES induces a form of  
255 range restriction, which could contribute to variable prediction accuracy across strata. We note,  
256 however, that we see highly variable prediction accuracies across SES strata even when the GWAS  
257 is conducted in all individuals (**Fig. 1E**); in that regard, our approach mimics what happens in  
258 practice when polygenic scores are used to predict phenotypes in a sample with a smaller range of  
259 SES (e.g., Rimfeld et al. 2018). More generally, although this type of range restriction is artificially  
260 amplified in our example, SES differences will often be a problem for GWAS in which the sample  
261 is not representative of the population; for instance, the most recent major GWAS of educational  
262 attainment (Lee et al. 2018) included numerous medical data sets and the 23andMe data set, which  
263 are not representative of the national population.

264

265 Another potentially important factor is that the adjustment for PCs may not be a sufficient control  
266 for the different ways in which population structure can confound GWAS results (Vilhjálmsón  
267 and Nordborg 2013), leading to variable prediction accuracy across strata if they differ in their  
268 population structure. To examine this possibility, we repeated the analysis in **Figs. 1B,D,F** but  
269 using a linear mixed model (LMM) approach (including PCs among other covariates; see  
270 **Materials and Methods**), and obtained qualitatively similar results (**Fig. S4**). Although not a  
271 perfect fix (Listgarten, Lippert, and Heckerman 2013; Mathieson and McVean 2013), the fact that  
272 we obtain similar results using PCs and LMM suggests that confounding due to population  
273 stratification in the UK Biobank alone does not explain the variable prediction accuracies across  
274 strata.

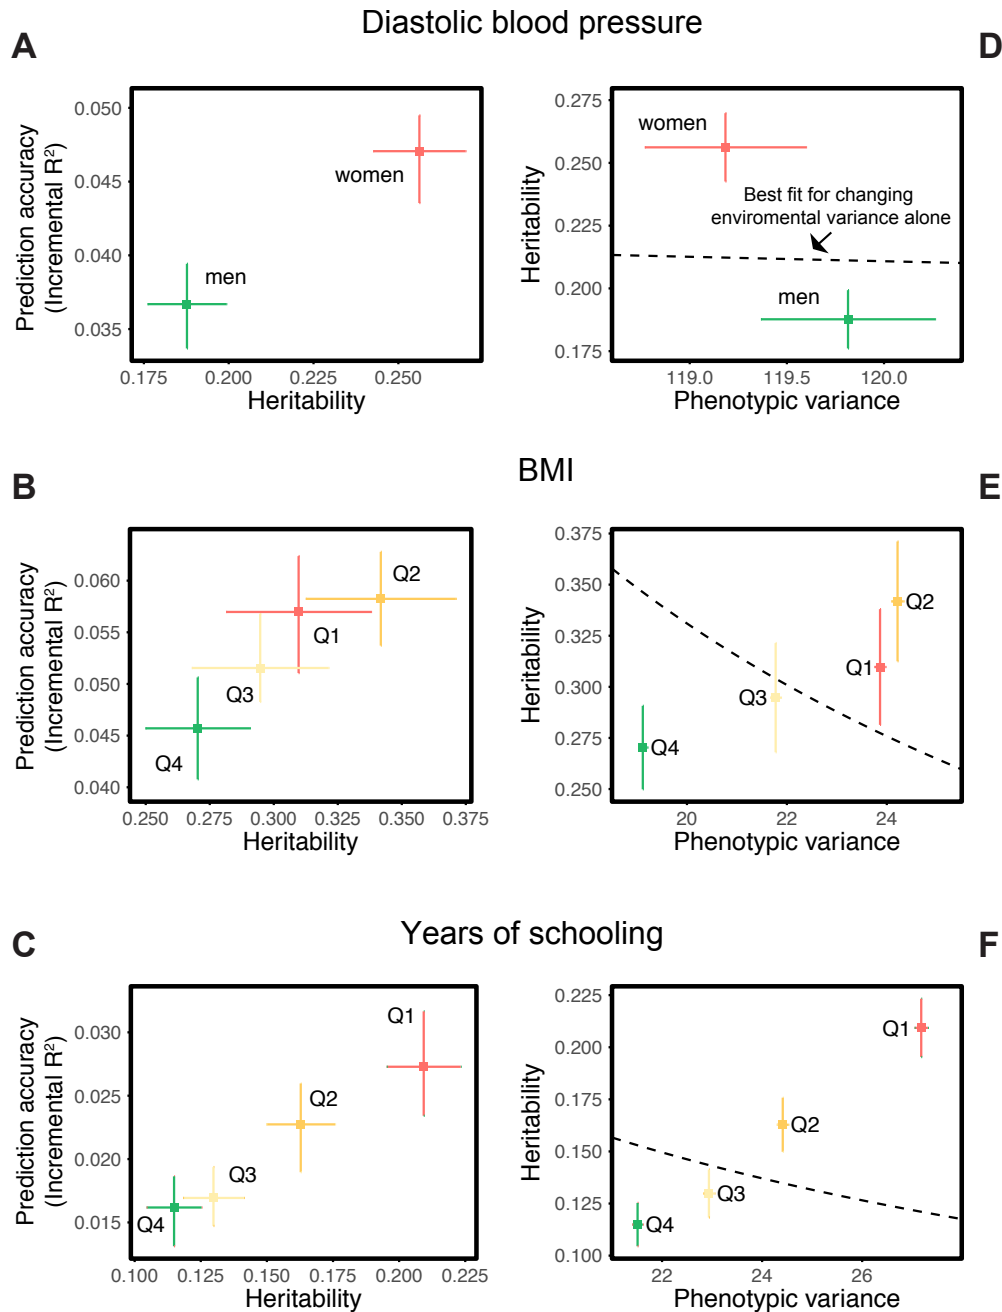

275

276

277

278

279

280

281

282

283

**Figure 2: Differences in environmental variance alone do not explain the variable prediction accuracy.** (A,B,C) The x-axes show heritability estimates ( $\pm$  SE) based on LD-score regression in each set. The y-axes show incremental  $R^2$  values as in Fig 1A,C,E. ‘Q’ denotes quartile of age and SES in (B) and (C), respectively. Throughout, prediction accuracy largely tracks SNP heritability. (D,E,F) The x-axes show phenotypic variance estimates ( $\pm$  SE) across strata after adjusting for covariates (sex, age and 20 PCs). If the heritability differences across strata are due to differences in environmental variance alone, with genetic variance constant, then heritability should be inversely proportional to phenotypic variance. However, the best fitting model for this inverse proportionality (dashed line) provides a poor fit.

284 **Potential portability obstacles explored through a comparison of standard and family-based**  
285 **GWAS**

286 Beyond sample characteristics, a number of factors may shape the portability of scores across  
287 groups of similar ancestry. Standard GWAS is done in samples of individuals that deliberately  
288 exclude close relatives; as implemented, it detects direct effects of the genetic variants, but can  
289 also detect any indirect genetic effects of parents, siblings, or peers, effects of assortative mating  
290 among parents, and potentially environmental differences associated with fine scale population  
291 structure (Kong et al. 2018; Young et al. 2018; Lee et al. 2018; Trejo and Domingue 2019; Berg et  
292 al. 2019). Given that many of these effects are likely to be culturally mediated (e.g., Robinson et  
293 al. 2017; Ruby et al. 2018; Selzam et al. 2019), it seems plausible that they may vary within as  
294 well as across groups of individuals with different ancestries. To the extent that they contribute to  
295 GWAS estimates and hence to PGS, they may lead to differences in the prediction accuracy in  
296 samples unlike the original GWAS.

297  
298 To demonstrate that these considerations are not just hypothetical, we compared the prediction  
299 accuracy when the PGS is trained on “unrelated” individuals such as those used in a standard  
300 GWAS to one obtained from a sibling-based (or “sib-based”) GWAS (**Materials and Methods**).  
301 In the latter, genotype differences between sibs—a result of random Mendelian segregation in the  
302 parents—are tested for association with the phenotypic difference between them. Because the tests  
303 depend on phenotypic differences between siblings who, of course, have the same parents, these  
304 tests are conditioned on the parental genotypes. Hence, they exclude many of the indirect effects  
305 signals that may be picked up in standard GWAS (**Supplementary Materials**). Differences  
306 between standard and sib-based GWAS are thus informative about the relative importance of  
307 factors other than direct genetic effects (Wood et al. 2014; Trejo and Domingue 2019; Lee et al.  
308 2018; Berg et al. 2019; Selzam et al. 2019).

309  
310 A challenge in this comparison is that the UKB contains about 22K sibling pairs, about 19K of  
311 which fall in the designation “White British” (WB). The siblings are similar to the unrelated  
312 individuals in terms of ages, SES distributions and genetic ancestries (**Figs. S5,S6**) but include a  
313 higher proportion of females; this difference is unlikely to influence our analyses (see below).  
314 While a large number, 19K pairs is still too few to have adequate power to discover trait-associated

315 SNPs, when compared to a standard GWAS using the much larger sample of unrelated WB  
316 individuals (~340K).

317

318 To increase power and enable a direct comparison between the two designs, we split the SNP  
319 ascertainment and effect estimation steps as follows (**Fig. 3A**): we identified SNPs using a standard  
320 GWAS with a large sample size (median ~270K across the traits considered) (see **Materials and**  
321 **Methods**). We then estimated the effect of each significant SNP using (i) a sib-based association  
322 test and (ii) a standard association test. We chose the size of the estimation set in (ii) such that the  
323 median standard error of effect estimates in (i) and (ii) is approximately equal. We then compared  
324 the prediction accuracy of the two PGS obtained in this way (“standard PGS” and “sib-based  
325 PGS”) in an independent prediction set of unrelated individuals; as we show in the **Supplementary**  
326 **Materials**, our approach leads to highly similar prediction accuracies of the two approaches under  
327 a model with direct effects only (see **Materials and Methods** for details)<sup>4</sup>. A further advantage is  
328 that the two scores are compared for the same set of SNPs, such that LD patterns and allele  
329 frequencies do not come into play.

330

331 We applied the approach to 22 traits, focusing on traits with relatively high heritability estimates  
332 as well as social and behavioral traits that have been the focus of recent attention in social sciences.  
333 For the majority of the traits, such as diastolic blood pressure, BMI, and hair color, the prediction  
334 accuracies of standard and sib-based PGS were similar, as expected under standard GWAS  
335 assumptions and as observed for two traits simulated under these assumptions (**Fig. 3B**). However,  
336 for a range of social and behavioral traits, such as years of schooling completed, pack years of  
337 smoking and age at first sexual intercourse, the prediction accuracy of the sib-based PGS was  
338 substantially lower than that of the standard PGS (**Fig. 3B**). It was also significantly lower for two  
339 morphological traits, height and whole body water mass.

340

341 A number of factors could contribute to the difference between prediction accuracies for PGS  
342 based on sibs versus unrelated individuals, including residual effects of population stratification,  
343 indirect genetic effects from parents and assortative mating. The relative importance of each factor

---

<sup>4</sup> Because the first step of our study design is to identify SNPs that are associated with the trait in a large set of unrelated individuals and we subsequently match the sampling variances of sib and standard GWAS, rather than identify distinct sets of SNPs separately in the two designs, the ratio of prediction accuracies that we obtain cannot be directly compared to those reported in other studies.

344 will vary across traits (Rosenberg et al. 2018; Kong et al. 2018; Haworth et al. 2019; Ruby et al.  
345 2018; Selzam et al. 2019); for educational attainment, this gap is likely to reflect at least in part  
346 the documented contribution of indirect genetic effects to the standard PGS (Lee et al. 2018; Kong  
347 et al. 2018; Young et al. 2018). We show in the **Supplementary Materials** that in the presence of  
348 indirect genetic effects mediated through parents, standard PGS outperforms sib-based PGS unless  
349 direct and indirect effects are strongly anticorrelated (**Fig. S7**), which seems unlikely to be the case  
350 for years of schooling. The difference in the performance of sib-based and standard PGS observed  
351 for other social and behavioral outcomes, such as household income and age at first sexual  
352 intercourse (**Fig. 3B**), may reflect a similar phenomenon. An additional contribution to divergent  
353 prediction accuracies could come from sibling indirect effects, which contribute differentially to  
354 standard and sibling-based PGS.

355

356 For height, there may be an important contribution of assortative mating to the difference in  
357 prediction accuracies (Wood et al. 2014; Robinson et al. 2017; Lee et al. 2018). In the  
358 **Supplementary Materials**, we show that under a simple model of positive assortative mating  
359 (mating of similar individuals), the prediction accuracy based on a standard PGS is better than that  
360 of a sib-based PGS (**Fig. S8**). The difference in the performance of sib-based and standard PGS  
361 observed for whole body water mass (**Fig. 3B**) could possibly reflect the same underlying effects  
362 of assortative mating, especially considering the high genetic correlation between the two traits  
363 (by bivariate LD score regression,  $\rho_g \approx 0.66$ ,  $p < 10^{-30}$ ). We further confirmed that the difference  
364 in the sex ratio of the siblings and unrelated individuals, mentioned earlier, has a negligible effect  
365 on these differences (**Fig. S9**).

366

367

368

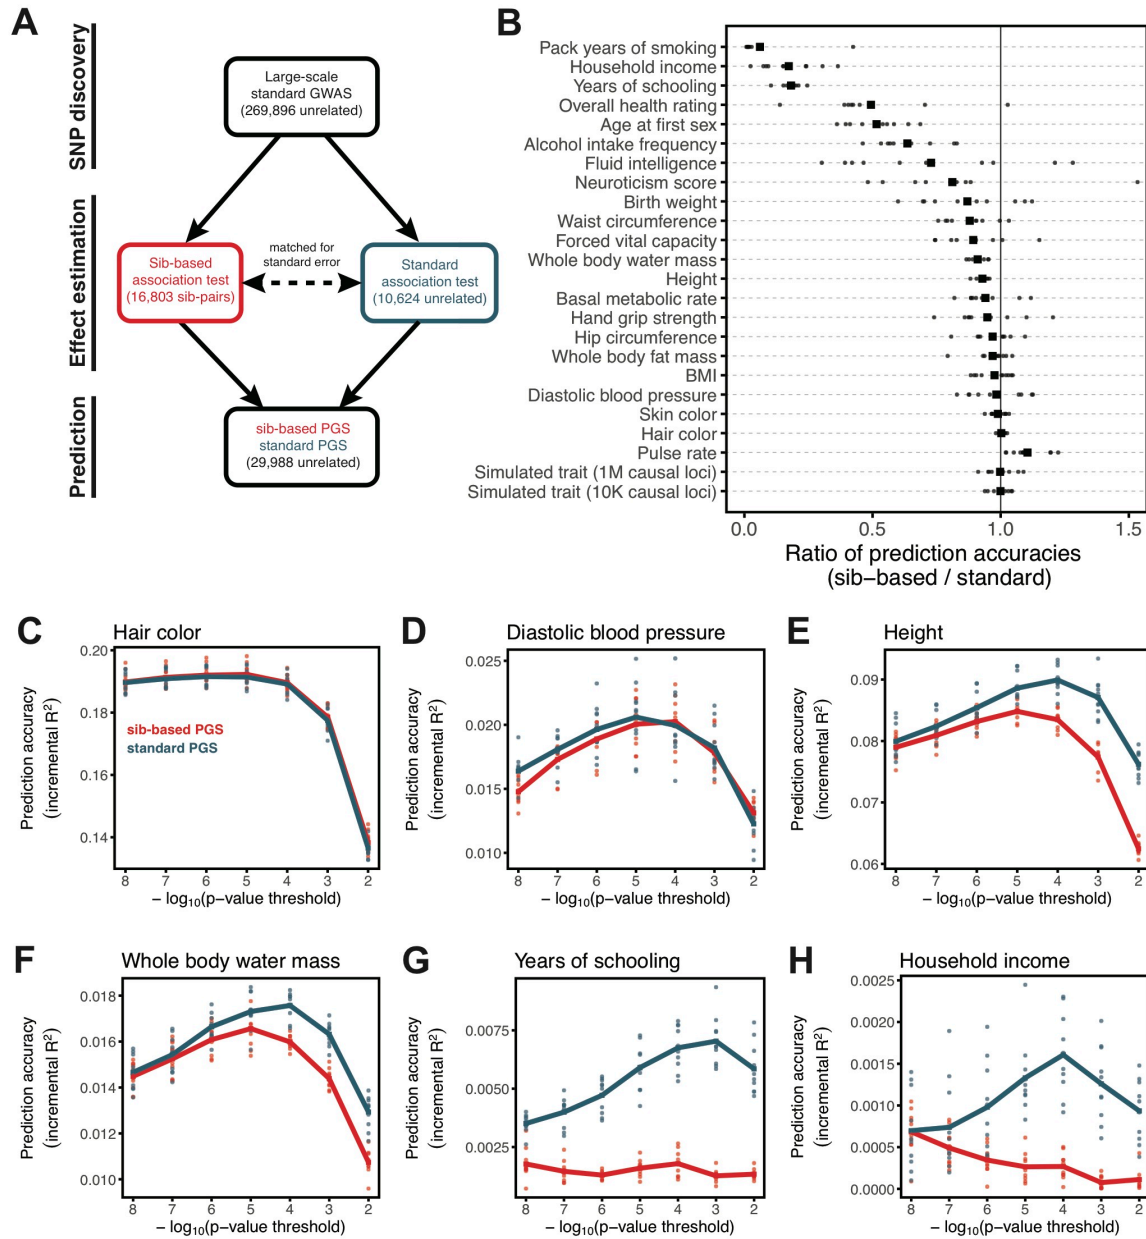

369

370

371

372

373

374

375

376

377

378

379

380

**Figure 3: Comparison of prediction accuracy of standard and sib-based polygenic scores.** (A) After ascertaining SNPs in a large sample of unrelated individuals, we estimated the effect of these SNPs with a standard regression using unrelated individuals and, independently, using sib-regression. We then used the polygenic scores for prediction in a third sample of unrelated individuals. We chose the sample size of the standard PGS estimation set such that median effect estimate SEs are equal in the two designs, thereby ensuring equal prediction accuracy under a vanilla model with no indirect effects or assortative mating. Numbers in parentheses are median sample size in each set across 22 traits in **Table S1** (see **Table S3** for sample sizes for each trait). (B) Ratio of prediction accuracy in the two designs across 22 traits. For each trait, we performed 10 resampling iterations of unrelated individuals into three sets for discovery, estimation and prediction (small points). Large points show mean values. (C-H) We repeated this procedure with different discovery-set p-value thresholds for including a SNP in the polygenic score. The higher the p-value threshold is, the more SNPs are included. For each p-value threshold, points show 10 iterations as described and lines show mean values. Shown are a subset of traits, with traits appearing in (B) but not shown here presented in **Fig. S10**.

381 Thus, in comparisons of the prediction accuracies for PGS derived from standard and sib-based  
382 association tests, many traits, notably behavioral ones, show substantial differences in  
383 performance. We caution that while lower prediction accuracies for PGS based on sib-based  
384 GWAS suggest that assortative mating or indirect effects play a substantial role, the magnitude of  
385 the ratio also depends on other features of the comparison like the sample sizes used (see  
386 **Supplementary Materials**). By matching the sampling errors of the two approaches (**Fig. 3A**),  
387 we ensure that prediction accuracies are comparable in the absence of complications such as  
388 assortative mating or indirect effects. But in the presence of these complications, the relative  
389 prediction accuracies will depend on sample sizes and on the contributions of environmental, direct  
390 and indirect genetic components to phenotypic variance. Indeed, we show in the **Supplementary**  
391 **Materials** that in the presence of indirect genetic effects or assortative mating, the difference in  
392 prediction accuracies between the two approaches stems in part from the noise-to-signal ratio for  
393 sib-based versus standard GWAS. An implication is that the gap between the prediction accuracy  
394 of sib-based and standard PGS should depend on the number of SNPs included in the polygenic  
395 scores (**Figs. S7,S8**).

396

397 Motivated by these considerations, we examined how the prediction accuracy varies when  
398 progressively relaxing the GWAS p-value threshold for inclusion of SNPs, i.e., when including  
399 more weakly associated SNPs in the PGS. (In **Fig. 3B**, results are shown for the p-value threshold  
400 that maximizes the prediction accuracy of the standard PGS, replicating the practice when  
401 comparing populations of different ancestry (Martin et al. 2019).) For hair color and blood  
402 pressure, there is little to no difference in prediction accuracy between the two estimation methods,  
403 regardless of the number of SNPs included in the score (**Figs. 3C,D**). In contrast, for height and  
404 whole body water mass, although standard and sib-based PGS perform similarly when based on  
405 the most significantly associated SNPs, standard PGS progressively outperforms sib-based PGS  
406 when more SNPs are included (**Figs. 3E,F**). Similarly, the difference in prediction accuracy  
407 between sib-based and standard PGS changes markedly for years of schooling, household income  
408 and other social and behavioral traits (**Figs. 3G,H and S10**). The growing gap in performance with  
409 increasing p-value threshold likely reflects a combination of an increasing noise-to-signal ratio in  
410 the sib-based PGS (see **Supplementary Materials**) and changes in the relative importance of  
411 direct effects versus other factors such as indirect parental effects and assortative mating.



412

413 In summary, the differences between the prediction accuracies of standard and sib-GWAS seen for  
414 a number of traits (**Fig. 3B**) demonstrate that standard GWAS estimates often include a substantial  
415 contribution of factors other than direct effects. In these cases, even if the power to detect direct  
416 effects were comparable, standard GWAS would lead to higher prediction accuracy than sib-  
417 GWAS. In some contexts that may be a sufficient reason to rely on PGS derived from standard  
418 GWAS. However, that gain stems from the inclusion of factors such as indirect effects and  
419 assortative mating that are likely to be modulated by SES, environment and culture (Selzam et al.  
420 2019; Stulp et al. 2017). Thus, the increased prediction accuracy likely comes at a cost of not  
421 always porting well across groups, even of the same ancestry, in ways that may be difficult to  
422 anticipate.

423

## 424 **Implications**

425 Although the conversation around the portability of PGS has largely focused on genetic ancestries,  
426 our results show that prediction accuracy can also differ, at times to a comparable extent, among  
427 groups of similar ancestry—even due to basic study design differences such as age and sex  
428 composition. If only due to increased environmental variance, such decreased accuracy would be  
429 acceptable, at least for certain applications. But as we have shown, differences in the degree of  
430 environmental variance are not the primary explanation for the patterns we report (**Fig. 2**), and  
431 other factors, including differences in the magnitude of genetic effects among groups, indirect  
432 effects and assortative mating, also lead to differences in the prediction accuracy of PGS, in ways  
433 that may make applications of phenotypic prediction problematic, even within a single ancestry  
434 group.

435

436 Following the discussion of portability across ancestries, we have focused on incremental  $R^2$  as a  
437 measure of portability, and it remains unknown to what extent the same issues also impact the use  
438 of PGS in reliably identifying individuals in the tails of the distribution, i.e., those at elevated risk  
439 of developing a disease—the main application of PGS in human genetics, as distinct from social  
440 science or evolutionary biology. Nonetheless, the same concerns are likely to apply, especially  
441 when the magnitude of genetic effects depends on GWAS characteristics.

442

443 In any case, these results make clear that the question of the domain over which a PGS applies is  
444 not just about population genetic parameters such as LD patterns and allele frequencies or GxG  
445 effects but also the extent of environmental variance, GxE, as well as the contribution of direct  
446 effects versus indirect effects, assortative mating and environmental confounding. An important  
447 implication is that differences in prediction accuracies among groups with distinct ancestries  
448 cannot be interpreted exclusively or even primarily in terms of population genetic parameters when  
449 these groups differ dramatically in their SES (Chetty et al. 2018; Conley 2010; Nuru-Jeter et al.  
450 2018; Reich 2017) and other factors that may affect portability—especially when the relative  
451 contribution of these factors to GWAS signals remains unknown. Thus, efforts to conduct GWAS  
452 in groups that vary in ancestry and geographic locations will need to be accompanied by a careful  
453 examination of variation in portability along other dimensions.

454

455 In that regard, it is worth noting that while classical twin studies were often constituted to be  
456 representative of a reference population (often national in nature) (Branigan, McCallum, and  
457 Freese 2013; Polderman et al. 2015), the same is not true of most contemporary human genetic  
458 datasets, which are skewed towards medical case-control studies, biobanks that are opt-in (and  
459 thus tend to be wealthier and better educated than the population average) or direct-to-consumer  
460 proprietary genetic databases (which are even more skewed along these dimensions) (Lee et al.  
461 2018). For instance, individuals in UK Biobank have higher SES than the rest of the British  
462 population (Fry et al. 2017) and are presumably self-selected for a certain level of interest in  
463 biomedical research. These factors alone raise challenges as to the broad portability of PGS derived  
464 from them.

465

466 One fruitful way forward may be to study data from related individuals, in which it should be  
467 possible to decompose the components of the signals identified in GWAS into direct and indirect  
468 effects, the degree of assortative mating and the contribution of residual stratification (Young et al.  
469 2018; Kong et al. 2018; Zhang et al. 2015). Not only will this decomposition help us to better  
470 interpret the results of GWAS and the resulting PGS, it will make it possible to examine under  
471 which circumstances, and for which phenotypes, components port more reliably to other sets of  
472 individuals, both unrelated and related. Ultimately, we envisage that in order to be broadly  
473 applicable, GWAS-based phenotypic prediction models will need to include not only a PGS but

474 some study characteristics, other social and environmental measures and, perhaps crucially, their  
475 interactions.

476

## 477 **Materials and Methods**

478

### 479 **UK Biobank**

480

481 The UK Biobank (UKB) is a large study of about half a million United Kingdom residents,  
482 recruited between 2006 to 2010 (Bycroft et al. 2017). In addition to genetic data, hundreds of  
483 phenotypes were collected through measurements and questionnaires at assessment centers, and  
484 by accessing medical records of the participants.

485

#### 486 *Inclusion criteria*

487

488 In this study, we focused on 408,494 participants who passed quality control (QC) measures  
489 provided by UKB; specifically, for whom the reported sex (QC parameter “Submitted.Gender”)  
490 matched their inferred sex from genotype data (QC parameter “Inferred.Gender”); who were not  
491 identified as outliers based on heterozygosity and missing rate (QC parameter  
492 “het.missing.outliers”==0); and did not have an excessive number of relatives in the database (QC  
493 parameter “excess.relatives”==0). We further restricted ourselves to those individuals identified  
494 by UKB to be of “White British” (WB) ancestry (QC parameter  
495 “in.white.British.ancestry.subset”==1), which is a label that refers to those who, when given a set  
496 of choices, self-reported to be of “White” and “British” ethnic backgrounds and, in addition, were  
497 tightly clustered in a principal component analysis of the genotype data, as detailed in (Bycroft et  
498 al. 2017). For a given trait, we further conditioned on individuals for which measurement or report  
499 of the trait value was available.

500

501

## 502 **Phenotype data**

503

504 We focused on 22 traits, including a range of well-studied physical, social, behavioral and health-  
505 related outcomes for which significant SNP heritabilities have been documented (see **Table S1** for  
506 a complete list of phenotypes, and their corresponding UK data field number). We calculated the  
507 phenotype “years of schooling” by converting the maximal educational qualification of the  
508 participants to years following Okbay et al. (Okbay et al. 2016) (**Table S4**). For diastolic blood  
509 pressure, pulse rate, and forced vital capacity, we took the average of the first two rounds of  
510 measurement taken during the same examination at UKB assessment centers. We adjusted the  
511 diastolic blood pressure levels for blood pressure lowering medication following Evangelou et al.  
512 (Evangelou et al. 2018) by shifting the values upward by 10 mm Hg for individuals taking  
513 medication. For hand grip strength, we took the average of the measurements for the two hands.  
514 The phenotype “household income” was defined as the average total household income before tax  
515 reported by the participants, categorized into five categories: less than £18,000, £18,000 to  
516 £29,999, £30,000 to £51,999, £52,000 to £100,000, and more than £100,000. For a subset of  
517 individuals, multiple measurements of a phenotype were provided, corresponding to multiple visits  
518 to UKB assessment centers; in those cases, we used the measurements during the first visit.

519

## 520 **Genotype data**

521

522 UKB participants were genotyped on either of two similar genotyping arrays, UK Biobank Axiom  
523 and UK BiLEVE arrays, at a total of ~850K markers. We focused on autosomal bi-allelic SNPs  
524 shared between both arrays, and used *plink v. 1.90b5* (Chang et al. 2015) to filter SNPs with calling  
525 rate  $>0.95$ , minor allele frequency  $>10^{-3}$ , and Hardy-Weinberg equilibrium test  $p\text{-val}>10^{-10}$  among  
526 the WB samples, resulting in 616,323 SNPs.

527

## 528 **GWAS and trait prediction methods**

529

### 530 ***GWAS by sample characteristics***

531 We focused on a set of 337,536 WB samples that were identified by the UKB to be “unrelated”  
532 (sample QC parameter “used.in.pca.calculation”=1 as provided by UKB), defined such that no

533 pairs of individuals are inferred to be 3<sup>rd</sup> degree relatives or closer. We split the sample into non-  
534 overlapping sets of individuals by one of the following factors: age at recruitment (in years), sex,  
535 and Townsend deprivation index at recruitment (used as a proxy for socioeconomic status or SES).  
536 For the Townsend deprivation index and age, we divided into four sets: Q1 [minimum value, first  
537 quartile], group 2 (first quartile, second quartile], group 3 (second quartile, third quartile], and  
538 group 4 (third quartile, maximum value]. We randomly selected 10K samples in each SES and age  
539 group, and 20K of males and 20K of females as held-out prediction sets, and performed GWAS  
540 using the remaining samples, matching sample sizes across groups in the GWAS set. We performed  
541 nine GWAS: for years of schooling in SES Q1 and SES Q4 (sample size 73,298 for each), and in  
542 the pooled sample of all four groups (sample size 293,192); for body mass index (BMI) in Q1  
543 and Q4 (sample size 72,343 for each), and in pooled sample of all four groups (sample size  
544 272,508); and for diastolic blood pressure in males and females (sample size 122,791 for each),  
545 and in a pooled sample of males and females (sample size 245,582). We performed all GWAS  
546 using *plink v. 2.0* (with flag: --linear), adjusting for sex, age and first 20 PCs as covariates. PCs are  
547 principal components of all genotype data, not just WB, as provided by UKB. For a subset of cases,  
548 (where GWAS was performed in samples restricted by characteristics described above), we  
549 additionally performed association tests using a linear mixed model (LMM) as implemented in  
550 *BOLT-LMM v. 2.3.2* (Loh et al. 2015), using LD scores computed from 1000 Genomes European-  
551 ancestry samples, with sex, age and first 20 PCs as covariates. The GWAS summary statistics were  
552 used to construct PGS for the samples in the prediction sets.

553

554 To better understand the performance of PGS across the strata (see “**Possible explanations for**  
555 **the variable prediction accuracy**”), we estimated the mean effect sizes of significant SNPs in  
556 each strata. To avoid overfitting, we first performed an association test in the pooled sample of all  
557 strata; then for significantly associated SNPs, we re-estimated the effect sizes in each of the strata.  
558 We performed 20 iterations of all above steps (**Fig. 1, Fig. S1-S4**).

559

560 We also considered two binary phenotypes (i) attained a college degree or not and (ii) attained any  
561 degree or not, for the analysis of educational attainment by SES (as described above for years of  
562 schooling), confirming that our analysis is robust to how education phenotype is coded (**Fig. S11**).

563 For these traits we used a logistic regression model for GWAS (using *plink v. 2.0* with flag: --  
564 logistic).

565

### 566 ***Standard versus sibling-based regression***

567 We used the genetic relatedness information provided by UKB to infer sibling pairs among the  
568 WB samples. Following Bycroft et al. (2017), we marked pairs with  $\frac{1}{25/2} < \phi < \frac{1}{23/2}$  and IBS0 >  
569 0.0012 as siblings, where  $\phi$  is the estimated kinship coefficient and IBS0 is the fraction of loci at  
570 which individuals share no alleles. By this approach, we identified 19,335 sibling pairs including  
571 35,464 individuals across 17,305 families. For a given trait, we included pairs with the property  
572 that trait values for both individuals were reported. We then formed two sets of individuals:  
573 “Siblings” set, including the sibling pairs randomly sampled to include only one pair per family,  
574 and an “Unrelateds” set, including the unrelated individuals identified by the UKB (see section  
575 GWAS by sample characteristics above), but excluding the Siblings and 7,409 individuals that  
576 were related to the Siblings (3rd degree or closer).

577

578 We focused on 22 traits (**Table S1**) and two simulated traits (see below). For each trait, we first  
579 downsampled the Unrelateds to a sample size  $n^*$  such that the median standard error of effect  
580 estimates roughly matched the median standard error in the sibling-based regression (see  
581 “*Estimating  $n^*$* ” below). We then divided the Unrelateds set into three non-overlapping sets: after  
582 sampling  $n^*$  individuals (Unrelateds- $n^*$  set), we randomly split the rest of the Unrelateds set into  
583 an Unrelateds-prediction set (10% of the samples) to be used as a sample for trait prediction  
584 (“prediction set”), and an unrelated individuals discovery set (90% of the samples) to be used for  
585 the discovery of trait associated variants (see **Table S3** for sample sizes in each set). For each trait,  
586 we performed standard GWAS in the Unrelateds-discovery set, and ascertained SNPs by  
587 thresholding on association p-values. We then estimated the effect sizes for these ascertained SNPs  
588 in two ways: by a sibling-based association test in the Siblings set (using *plink v. 1.90b5*’s QFAM  
589 procedure; flag: --qfam), and by a standard association test in the Unrelateds- $n^*$  set (using *plink v.*  
590 *2.0*). Subsequently, for each set of ascertained SNPs in the Unrelateds-discovery set, two PGS were  
591 constructed for the samples in the Unrelateds-prediction set (see **Fig. 3A** for overview of the  
592 pipeline). We performed 10 iterations of the above sampling, ascertainment and estimation steps.

593

### 594 *Estimating $n^*$*

595 In order to compare the performance of sibling-based and standard GWAS designs, we wanted to  
596 match both analyses to have similar prediction accuracy under a vanilla model of no assortative  
597 mating, population structure stratification or indirect effects. In the **Supplementary Materials**,  
598 we show that this could be achieved by matching median effect estimate standard errors. For each  
599 trait, we therefore calculated  $n^*$ , the sample size of a standard GWAS that yields roughly equal  
600 standard errors in the standard and sibling-based regressions. Specifically, for each trait, we first  
601 performed sibling-based GWAS in the Siblings using plink's QFAM procedure (using the flag: --  
602 qfam mperm=100000 emp-se). We then randomly sampled a range of sample sizes from the set of  
603 Unrelateds, from 5K to 20K in 1K increments. Following Wood et al. (Wood et al. 2014), for each  
604 sample size, we performed a standard GWAS, and investigated the linear relationship between the  
605 square root of the sample size and the inverse of the median standard error of the effect size  
606 estimates. We then used this linear relationship to estimate the sample size of a standard GWAS  
607 that corresponds to the inverse of the median standard error of the effect sizes estimate in the  
608 sibling-based GWAS.

609

610 All standard association tests were performed using *plink v. 2.0* (using the flag: --linear), adjusting  
611 for sex, age and first 20 PCs as covariates. For sibling-based association tests we first residualized  
612 the phenotypic values on the same covariates, and then regressed the sibling differences in  
613 residuals on sibling genotypic differences using plink's QFAM procedure as described above.

614

615 We also considered a version of the analysis described above, in which we first residualized the  
616 phenotypes on covariates in the pooled sample of all WB individuals, and then ran the pipeline on  
617 the residuals without further adjustment for covariates in the GWAS or prediction evaluation. As  
618 shown in **Fig. S12**, this approach produced results that are qualitatively the same to what we  
619 present in **Fig. 3**.

620

### 621 *Simulated traits*

622 We wanted to check that given the study design described above, sibling-based and standard  
623 GWAS perform similarly with respect to trait prediction, under the vanilla model of no population  
624 stratification, assortative mating or indirect genetic effects (**Fig. 3**). To this end, we simulated two

625 traits with (i) heritability  $h^2 = 0.5$  and  $m = 10,000$  causal loci, and (ii) heritability  $h^2 = 0.5$  and  
626  $m = 1,000,000$  causal SNPs.

627

628 We randomly selected the causal SNPs from a set of 10,879,183 imputed SNPs, considering that  
629 most causal variants are plausibly not directly genotyped on SNP arrays. We used a set of SNPs  
630 that passed quality control procedures by the Neale lab (<http://www.nealelab.is/uk-biobank>),  
631 namely autosomal SNPs, imputed using the haplotype reference consortium (HRC) panel, which  
632 have INFO score  $> 0.8$  and have minor allele frequency  $> 10^{-4}$ ; we further limited the SNP set to  
633 ones that were bi-allelic in the WB sample. As in Martin et al. (Martin et al. 2017), we randomly  
634 assigned effect sizes to these causal SNPs as  $\beta \sim N\left(0, \frac{h^2}{m}\right)$ , and zero for non-causal SNPs. We then  
635 calculated genetic component of the trait,  $g$ , for all WB samples under an additive model by  
636 summing the allelic counts weighted by their effect sizes using plink (using the flag: --score).  
637 Allelic counts were determined by converting imputation dosages to genotype calls with no hard  
638 calling threshold. We also assigned environmental contributions as  $\varepsilon \sim N(0, 1 - h^2)$ , and then  
639 constructed the PGS for each individual,

640

$$g = \sum_{i=1}^m \beta_i X_i,$$

641 where  $X_i$  is the number of minor alleles at SNP  $i$  carried by the individual, and the trait value for  
642 the individual is calculated as the sum of genetic and environmental contributions:

643

$$y = \sqrt{h^2} \left( \frac{g - \bar{g}}{\sigma_g} \right) + \sqrt{1 - h^2} \left( \frac{\varepsilon - \bar{\varepsilon}}{\sigma_\varepsilon} \right)$$

644 where bars represent averages,  $\sigma_g$  is the standard deviation of PGS across individuals and  $\sigma_\varepsilon$  is the  
645 standard deviation of environmental contributions across individuals. These simulated traits were  
646 then analyzed using the same pipelines as the other traits (e.g., adjusting for covariates etc.).  
647 Importantly, SNP discovery and effect size estimations in GWAS were performed without  
648 knowledge of the causal SNPs.

649

### 650 ***Polygenic score (PGS) construction and trait prediction***

651 For all GWAS designs described above, we used p-value thresholding followed by clumping to  
652 choose sets of roughly independent SNPs to build PGS. We considered a logarithmically-spaced



653 range of p-values:  $10^{-8}$ ,  $10^{-7}$ ,  $10^{-6}$ ,  $10^{-5}$ ,  $10^{-4}$ ,  $10^{-3}$ , and  $10^{-2}$  (or a subset if no SNP reached that  
654 significance level). We then used plink's clumping procedure (using the flag: --clump) with LD  
655 threshold  $r^2 < 0.1$  (using 10,000 randomly selected unrelated WB samples as a reference for LD  
656 structure) and physical distance threshold of  $>1\text{MB}$ . The selected SNPs were then used to calculate  
657 PGS for individuals in the prediction sets, by summing the allelic counts weighted by their  
658 estimated effect sizes (log of the odds ratios in the case of binary traits) using plink (using the flag:  
659 --score). We calculated the incremental  $R^2$ : we first determined  $R^2$  in a regression of the phenotype  
660 to the covariates, and then calculated the change in  $R^2$  when including the PGS as a predictor. For  
661 binary traits, we calculated incremental Nagelkerke's  $R^2$ .

662

### 663 *Estimating heritability and genetic correlation*

664 We calculated SNP heritability across sex, age and SES groups for diastolic blood pressures, BMI  
665 and years of schooling, respectively (as described in the section "GWAS by sample  
666 characteristics") as well as genetic correlations across pairs of groups: we first performed GWAS  
667 using all unrelated WB individuals in each group. We then used the GWAS summary statistics to  
668 perform LD-score regression with LD scores computed from the 1000 Genomes European-  
669 ancestry samples (Bulik-Sullivan et al. 2015). We also calculated genetic correlation between  
670 height and whole body water mass, using all unrelated WB individuals for GWAS.

671

672

### 673 **Acknowledgements**

674 We are grateful to Ipsita Agarwal, Daniel Belsky, Jeremy Berg, Graham Coop, Doc Edge, Iain  
675 Mathieson, Augustine Kong, Magnus Nordborg, Guy Sella, Alex Young and members of the  
676 Przeworski and Sella labs for valuable discussions and Ipsita Agarwal and Doc Edge for comments  
677 on a draft of the manuscript. This work was funded by NIH GM121372 to MP, NIH HG008140  
678 to JKP and Robert Wood Johnson Foundation Pioneer Award (grant number 84337817) to DC.

679

680

## 681 **References**

682

683 Adhikari, Kaustubh, Javier Mendoza-Revilla, Anood Sohail, Macarena Fuentes-Guajardo, Jodie  
684 Lampert, Juan Camilo Chacón-Duque, Malena Hurtado, et al. 2019. “A GWAS in Latin  
685 Americans Highlights the Convergent Evolution of Lighter Skin Pigmentation in Eurasia.”  
686 *Nature Communications* 10 (1). <https://doi.org/10.1038/s41467-018-08147-0>.

687 Barcellos, Silvia H, Leandro S Carvalho, and Patrick Turley. 2018. “Education Can Reduce Health  
688 Disparities Related to Genetic Risk of Obesity: Evidence from a British Reform.” *BioRxiv*,  
689 260463.

690 Belsky, Daniel W, Benjamin W Domingue, Robbee Wedow, Louise Arseneault, Jason D  
691 Boardman, Avshalom Caspi, Dalton Conley, et al. 2018. “Genetic Analysis of Social-Class  
692 Mobility in Five Longitudinal Studies.” *Proceedings of the National Academy of Sciences*  
693 115 (31): E7275--E7284.

694 Bentley, Amy R, Yun J Sung, Michael R Brown, Thomas W Winkler, Aldi T Kraja, Ioanna Ntalla,  
695 Karen Schwander, et al. 2019. “Multi-Ancestry Genome-Wide Gene--Smoking Interaction  
696 Study of 387,272 Individuals Identifies New Loci Associated with Serum Lipids.” *Nature*  
697 *Genetics* 51 (4): 636.

698 Berg, Jeremy J, and Graham Coop. 2014. “A Population Genetic Signal of Polygenic Adaptation.”  
699 *PLoS Genetics* 10 (8): e1004412.

700 Berg, Jeremy J, Arbel Harpak, Nicholas Sinnott-Armstrong, Anja M. Joergensen, Hakhamanesh  
701 Mostafavi, Yair Field, Evan A. Boyle, et al. 2019. “Reduced Signal for Polygenic Adaptation  
702 of Height in UK Biobank.” *ELife* 8. <https://doi.org/10.7554/eLife.39725>.

703 Boyle, Evan A, Yang I Li, and Jonathan K Pritchard. 2017. “An Expanded View of Complex Traits:  
704 From Polygenic to Omnigenic.” *Cell* 169 (7): 1177–86.

705 Branigan, Amelia R, Kenneth J McCallum, and Jeremy Freese. 2013. “Variation in the Heritability  
706 of Educational Attainment: An International Meta-Analysis.” *Social Forces* 92 (1): 109–40.

707 Bulik-Sullivan, Brendan K, Po-Ru Loh, Hilary K Finucane, Stephan Ripke, Jian Yang, Nick  
708 Patterson, Mark J Daly, et al. 2015. “LD Score Regression Distinguishes Confounding from  
709 Polygenicity in Genome-Wide Association Studies.” *Nature Genetics* 47 (3): 291.

710 Bycroft, Clare, Colin Freeman, Desislava Petkova, Gavin Band, Lloyd T Elliott, Kevin Sharp,

- 711 Allan Motyer, et al. 2017. “Genome-Wide Genetic Data On~ 500,000 UK Biobank  
712 Participants.” *BioRxiv*, 166298.
- 713 Chang, Christopher C, Carson C Chow, Laurent C A M Tellier, Shashaank Vattikuti, Shaun M  
714 Purcell, and James J Lee. 2015. “Second-Generation PLINK: Rising to the Challenge of  
715 Larger and Richer Datasets.” *Gigascience* 4 (1): 7.
- 716 Chetty, Raj, Nathaniel Hendren, Maggie R Jones, and Sonya R Porter. 2018. “Race and Economic  
717 Opportunity in the United States: An Intergenerational Perspective.”
- 718 Conley, Dalton. 2010. *Being Black, Living in the Red: Race, Wealth, and Social Policy in America*.  
719 Univ of California Press.
- 720 ———. 2016. “Socio-Genomic Research Using Genome-Wide Molecular Data.” *Annual Review*  
721 *of Sociology* 42: 275–99.
- 722 Conley, Dalton, Benjamin W Domingue, David Cesarini, Christopher Dawes, Cornelius A  
723 Rietveld, and Jason D Boardman. 2015. “Is the Effect of Parental Education on Offspring  
724 Biased or Moderated by Genotype?” *Sociological Science* 2: 82.
- 725 Davies, Neil M, Matt Dickson, George Davey Smith, Gerard J Van Den Berg, and Frank  
726 Windmeijer. 2018. “The Causal Effects of Education on Health Outcomes in the UK  
727 Biobank.” *Nature Human Behaviour* 2 (2): 117.
- 728 Domingue, Benjamin W, Daniel W Belsky, Jason M Fletcher, Dalton Conley, Jason D Boardman,  
729 and Kathleen Mullan Harris. 2018. “The Social Genome of Friends and Schoolmates in the  
730 National Longitudinal Study of Adolescent to Adult Health.” *Proceedings of the National*  
731 *Academy of Sciences* 115 (4): 702–7.
- 732 Domingue, Benjamin W, Jason Fletcher, Dalton Conley, and Jason D Boardman. 2014. “Genetic  
733 and Educational Assortative Mating among US Adults.” *Proceedings of the National*  
734 *Academy of Sciences* 111 (22): 7996–8000.
- 735 Dudbridge, Frank. 2013. “Power and Predictive Accuracy of Polygenic Risk Scores.” *PLoS*  
736 *Genetics* 9 (3): e1003348.
- 737 Duncan, Laramie, Hanyang Shen, Bizu Gelaye, Kerry Ressler, Marcus Feldman, Roseann  
738 Peterson, and Benjamin Domingue. 2018. “Analysis of Polygenic Score Usage and  
739 Performance across Diverse Human Populations.” *BioRxiv*, 398396.
- 740 Edge, Michael D, and Graham Coop. 2019. “Reconstructing the History of Polygenic Scores Using  
741 Coalescent Trees.” *Genetics* 211 (1): 235–62.

- 742 Elks, C E, M den Hoed, J H Zhao, S J Sharp, N J Wareham, R J F Loos, and K K Ong. 2012.  
743 “Variability in the Heritability of Body Mass Index: A Systematic Review and Meta-  
744 Regression. *Front Endocrinol* 3: 29.”
- 745 Euesden, Jack, Cathryn M Lewis, and Paul F O’reilly. 2014. “PRSice: Polygenic Risk Score  
746 Software.” *Bioinformatics* 31 (9): 1466–68.
- 747 Evangelou, Evangelos, Helen R Warren, David Mosen-Ansorena, Borbala Mifsud, Raha Pazoki,  
748 He Gao, Georgios Ntritsos, et al. 2018. “Genetic Analysis of over 1 Million People Identifies  
749 535 New Loci Associated with Blood Pressure Traits.” *Nature Genetics* 50 (10): 1412.
- 750 Field, Yair, Evan A Boyle, Natalie Telis, Ziyue Gao, Kyle J Gaulton, David Golan, Loic Yengo, et  
751 al. 2016. “Detection of Human Adaptation during the Past 2000 Years.” *Science* 354 (6313):  
752 760–64.
- 753 Francisco, M, and Carlos D Bustamante. 2018. “Polygenic Risk Scores: A Biased Prediction?”  
754 *Genome Medicine* 10 (1): 100.
- 755 Fry, Anna, Thomas J Littlejohns, Cathie Sudlow, Nicola Doherty, Ligia Adamska, Tim Sprosen,  
756 Rory Collins, and Naomi E Allen. 2017. “Comparison of Sociodemographic and Health-  
757 Related Characteristics of UK Biobank Participants with Those of the General Population.”  
758 *American Journal of Epidemiology* 186 (9): 1026–34.
- 759 Ge, Tian, Chia-Yen Chen, Benjamin M Neale, Mert R Sabuncu, and Jordan W Smoller. 2017.  
760 “Phenome-Wide Heritability Analysis of the UK Biobank.” *PLoS Genetics* 13 (4): e1006711.
- 761 Gibson, Greg. 2008. “The Environmental Contribution to Gene Expression Profiles.” *Nature*  
762 *Reviews Genetics* 9 (8): 575.
- 763 Haworth, Simon, Ruth Mitchell, Laura Corbin, Kaitlin H Wade, Tom Dudding, Ashley Budu-  
764 Aggrey, David Carslake, et al. 2019. “Apparent Latent Structure within the UK Biobank  
765 Sample Has Implications for Epidemiological Analysis.” *Nature Communications* 10 (1):  
766 333.
- 767 Hoellinger, Ilse, Pleuni S Pennings, and Joachim Hermisson. 2019. “Polygenic Adaptation: From  
768 Sweeps to Subtle Frequency Shifts.” *PLoS Genetics* 15 (3): e1008035.
- 769 Inouye, Michael, Gad Abraham, Christopher P Nelson, Angela M Wood, Michael J Sweeting,  
770 Frank Dudbridge, Florence Y Lai, et al. 2018. “Genomic Risk Prediction of Coronary Artery  
771 Disease in 480,000 Adults: Implications for Primary Prevention.” *Journal of the American*  
772 *College of Cardiology* 72 (16): 1883–93.

- 773 Kathiresan, Sekar, Olle Melander, Dragi Anevski, Candace Guiducci, Noël P Burt, Charlotta  
774 Roos, Joel N Hirschhorn, et al. 2008. “Polymorphisms Associated with Cholesterol and Risk  
775 of Cardiovascular Events.” *New England Journal of Medicine* 358 (12): 1240–49.
- 776 Khera, Amit V., Mark Chaffin, Krishna G. Aragam, Mary E. Haas, Carolina Roselli, Seung Hoan  
777 Choi, Pradeep Natarajan, et al. 2018. “Genome-Wide Polygenic Scores for Common Diseases  
778 Identify Individuals with Risk Equivalent to Monogenic Mutations.” *Nature Genetics* 50 (9):  
779 1219–24. <https://doi.org/10.1038/s41588-018-0183-z>.
- 780 Khera, Amit V, Mark Chaffin, Kaitlin H Wade, Sohail Zahid, Joseph Brancale, Rui Xia, Marina  
781 Distefano, et al. 2019. “Polygenic Prediction of Weight and Obesity Trajectories from Birth  
782 to Adulthood.” *Cell* 177 (3): 587–96.
- 783 Kim, Michelle S, Kane P Patel, Andrew K Teng, Ali J Berens, and Joseph Lachance. 2018.  
784 “Genetic Disease Risks Can Be Misestimated across Global Populations.” *Genome Biology*  
785 19 (1): 179.
- 786 Kong, Augustine, Gudmar Thorleifsson, Michael L. Frigge, Bjarni J. Vilhjalmsón, Alexander I.  
787 Young, Thorgeir E. Thorgeirsson, Stefania Benonisdóttir, et al. 2018. “The Nature of Nurture:  
788 Effects of Parental Genotypes.” *Science* 359 (6374): 424–28.  
789 <https://doi.org/10.1126/science.aan6877>.
- 790 Lawson, Daniel John, Neil Martin Davies, Simon Haworth, Bilal Ashraf, Laurence Howe, Andrew  
791 Crawford, Gibran Hemani, George Davey Smith, and Nicholas John Timpson. 2019. “Is  
792 Population Structure in the Genetic Biobank Era Irrelevant, a Challenge, or an Opportunity?”  
793 *Human Genetics*, 1–19.
- 794 Lee, James J., Robbee Wedow, Aysu Okbay, Edward Kong, Omeed Maghziyan, Meghan Zacher,  
795 Tuan Anh Nguyen-Viet, et al. 2018. “Gene Discovery and Polygenic Prediction from a  
796 Genome-Wide Association Study of Educational Attainment in 1.1 Million Individuals.”  
797 *Nature Genetics* 50 (8): 1112–21. <https://doi.org/10.1038/s41588-018-0147-3>.
- 798 Listgarten, Jennifer, Christoph Lippert, and David Heckerman. 2013. “FaST-LMM-Select for  
799 Addressing Confounding from Spatial Structure and Rare Variants.” *Nature Genetics* 45 (5):  
800 470–71. <https://doi.org/10.1038/ng.2620>.
- 801 Loh, Po Ru, George Tucker, Brendan K. Bulik-Sullivan, Bjarni J. Vilhjalmsón, Hilary K.  
802 Finucane, Rany M. Salem, Daniel I. Chasman, et al. 2015. “Efficient Bayesian Mixed-Model  
803 Analysis Increases Association Power in Large Cohorts.” *Nature Genetics* 47 (3): 284–90.

- 804 <https://doi.org/10.1038/ng.3190>.
- 805 Lynch, Michael, and Bruce Walsh. 1998. *Genetics and Analysis of Quantitative Traits*. Vol. 1.  
806 Sinauer Sunderland, MA.
- 807 Martin, Alicia R., Christopher R. Gignoux, Raymond K. Walters, Genevieve L. Wojcik, Benjamin  
808 M. Neale, Simon Gravel, Mark J. Daly, Carlos D. Bustamante, and Eimear E. Kenny. 2017.  
809 “Human Demographic History Impacts Genetic Risk Prediction across Diverse Populations.”  
810 *American Journal of Human Genetics* 100 (4): 635–49.  
811 <https://doi.org/10.1016/j.ajhg.2017.03.004>.
- 812 Martin, Alicia R, Masahiro Kanai, Yoichiro Kamatani, Yukinori Okada, Benjamin M Neale, and  
813 Mark J Daly. 2019. “Clinical Use of Current Polygenic Risk Scores May Exacerbate Health  
814 Disparities.” *Nature Genetics* 51 (April): 441261. <https://doi.org/10.1101/441261>.
- 815 Martin, Alicia R, Solomon Teferra, Marlo Möller, Eileen G Hoal, and Mark J Daly. 2018. “The  
816 Critical Needs and Challenges for Genetic Architecture Studies in Africa.” *Current Opinion*  
817 *in Genetics & Development* 53: 113–20.
- 818 Mathieson, Iain, and Gil McVean. 2013. “Reply to:” FaST-LMM-Select for Addressing  
819 Confounding from Spatial Structure and Rare Variants.” *Nature Genetics* 45 (5): 471.
- 820 Mavaddat, Nasim, Kyriaki Michailidou, Joe Dennis, Michael Lush, Laura Fachal, Andrew Lee,  
821 Jonathan P. Tyrer, et al. 2019. “Polygenic Risk Scores for Prediction of Breast Cancer and  
822 Breast Cancer Subtypes.” *American Journal of Human Genetics* 104 (1): 21–34.  
823 <https://doi.org/10.1016/j.ajhg.2018.11.002>.
- 824 Mostafavi, Hakhamanesh, Tomaz Berisa, Felix R Day, John R B Perry, Molly Przeworski, and  
825 Joseph K Pickrell. 2017. “Identifying Genetic Variants That Affect Viability in Large  
826 Cohorts.” *PLoS Biology* 15 (9): e2002458.
- 827 Nuru-Jeter, Amani M, Elizabeth K Michaels, Marilyn D Thomas, Alexis N Reeves, Roland J  
828 Thorpe Jr, and Thomas A LaVeist. 2018. “Relative Roles of Race versus Socioeconomic  
829 Position in Studies of Health Inequalities: A Matter of Interpretation.” *Annual Review of*  
830 *Public Health* 39: 169–88.
- 831 Okbay, Aysu, Jonathan P Beauchamp, Mark Alan Fontana, James J Lee, Tune H Pers, Cornelius A  
832 Rietveld, Patrick Turley, et al. 2016. “Genome-Wide Association Study Identifies 74 Loci  
833 Associated with Educational Attainment.” *Nature* 533 (7604): 539.
- 834 Pharoah, Paul D P, Antonis C Antoniou, Douglas F Easton, and Bruce A J Ponder. 2008.

- 835 “Polygenes, Risk Prediction, and Targeted Prevention of Breast Cancer.” *New England*  
836 *Journal of Medicine* 358 (26): 2796–2803.
- 837 Polderman, Tinca J C, Beben Benyamin, Christiaan A De Leeuw, Patrick F Sullivan, Arjen Van  
838 Bochoven, Peter M Visscher, and Danielle Posthuma. 2015. “Meta-Analysis of the  
839 Heritability of Human Traits Based on Fifty Years of Twin Studies.” *Nature Genetics* 47 (7):  
840 702.
- 841 Popejoy, Alice B, and Stephanie M Fullerton. 2016. “Genomics Is Failing on Diversity.” *Nature*  
842 *News* 538 (7624): 161.
- 843 Pritchard, Jonathan K, and Molly Przeworski. 2001. “Linkage Disequilibrium in Humans: Models  
844 and Data.” *The American Journal of Human Genetics* 69 (1): 1–14.
- 845 Pritchard, Jonathan K, and Anna Di Rienzo. 2010. “Adaptation--Not by Sweeps Alone.” *Nature*  
846 *Reviews Genetics* 11 (10): 665.
- 847 Reckelhoff, Jane F. 2001. “Gender Differences in the Regulation of Blood Pressure.” *Hypertension*  
848 37 (5): 1199–1208.
- 849 Reich, Michael. 2017. *Racial Inequality: A Political-Economic Analysis*. Vol. 4883. Princeton  
850 University Press.
- 851 Rimfeld, Kaili, Eva Krapohl, Maciej Trzaskowski, Jonathan R.I. Coleman, Saskia Selzam, Philip  
852 S. Dale, Tõnu Esko, Andres Metspalu, and Robert Plomin. 2018. “Genetic Influence on Social  
853 Outcomes during and after the Soviet Era in Estonia.” *Nature Human Behaviour* 2 (4): 269–  
854 75. <https://doi.org/10.1038/s41562-018-0332-5>.
- 855 Robinson, Matthew R, Aaron Kleinman, Mariaelisa Graff, Anna A E Vinkhuyzen, David Couper,  
856 Michael B Miller, Wouter J Peyrot, et al. 2017. “Genetic Evidence of Assortative Mating in  
857 Humans.” *Nature Human Behaviour* 1 (1): 16.
- 858 Rosenberg, Noah A, Michael D Edge, Jonathan K Pritchard, and Marcus W Feldman. 2018.  
859 “Interpreting Polygenic Scores, Polygenic Adaptation, and Human Phenotypic Differences.”  
860 *Evolution, Medicine, and Public Health* 2019 (1): 26–34.
- 861 Ruby, J Graham, Kevin M Wright, Kristin A Rand, Amir Kermany, Keith Noto, Don Curtis, Neal  
862 Varner, et al. 2018. “Estimates of the Heritability of Human Longevity Are Substantially  
863 Inflated Due to Assortative Mating.” *Genetics* 210 (3): 1109–24.
- 864 Selzam, Saskia, Stuart J Ritchie, Jean-baptiste Pingault, Chandra A Reynolds, Paul F O’Reilly, and  
865 Robert Plomin. 2019. “Comparing Within- and between-Family Polygenic Score Prediction

- 866 Authors.” *BioRxiv*, 1–32.
- 867 Sirugo, Giorgio, Scott M Williams, and Sarah A Tishkoff. 2019. “The Missing Diversity in Human  
868 Genetic Studies.” *Cell* 177 (1): 26–31.
- 869 Sohail, Mashaal, Robert M Maier, Andrea Ganna, Alex Bloemendal, Alicia R Martin, Michael C  
870 Turchin, Charleston W K Chiang, et al. 2019. “Polygenic Adaptation on Height Is  
871 Overestimated Due to Uncorrected Stratification in Genome-Wide Association Studies.”  
872 *ELife* 8: e39702.
- 873 Speidel, Leo, Marie Forest, Sinan Shi, and Simon Myers. 2019. “A Method for Genome-Wide  
874 Genealogy Estimation for Thousands of Samples.” *BioRxiv*, 550558.
- 875 Stulp, Gert, Mirre J.P. Simons, Sara Grasman, and Thomas V. Pollet. 2017. “Assortative Mating  
876 for Human Height: A Meta-Analysis.” *American Journal of Human Biology* 29 (1): 1–10.  
877 <https://doi.org/10.1002/ajhb.22917>.
- 878 Torkamani, Ali, Nathan E Wineinger, and Eric J Topol. 2018. “The Personal and Clinical Utility  
879 of Polygenic Risk Scores.” *Nature Reviews Genetics* 19 (9): 581.
- 880 Trejo, Sam, and Benjamin W Domingue. 2019. “Genetic Nature or Genetic Nurture? Quantifying  
881 Bias in Analyses Using Polygenic Scores.” *BioRxiv*, 524850.
- 882 Uricchio, Lawrence H., Hugo C. Kitano, Alexander Gusev, and Noah A. Zaitlen. 2019. “An  
883 Evolutionary Compass for Detecting Signals of Polygenic Selection and Mutational Bias.”  
884 *Evolution Letters* 3 (1): 69–79. <https://doi.org/10.1002/evl3.97>.
- 885 Vilhjálmsón, Bjarni J., and Magnus Nordborg. 2013. “The Nature of Confounding in Genome-  
886 Wide Association Studies.” *Nature Reviews Genetics* 14 (1): 1–2.  
887 <https://doi.org/10.1038/nrg3382>.
- 888 Vilhjálmsón, Bjarni J, Jian Yang, Hilary K Finucane, Alexander Gusev, Sara Lindström, Stephan  
889 Ripke, Giulio Genovese, et al. 2015. “Modeling Linkage Disequilibrium Increases Accuracy  
890 of Polygenic Risk Scores.” *The American Journal of Human Genetics* 97 (4): 576–92.
- 891 Ware, Erin B, Lauren L Schmitz, Jessica D Faul, Arianna Gard, Colter Mitchell, Jennifer A Smith,  
892 Wei Zhao, David Weir, and Sharon L R Kardia. 2017. “Heterogeneity in Polygenic Scores for  
893 Common Human Traits.” *BioRxiv*, 106062.
- 894 Weedon, Michael N, Hana Lango, Cecilia M Lindgren, Chris Wallace, David M Evans, Massimo  
895 Mangino, Rachel M Freathy, et al. 2008. “Genome-Wide Association Analysis Identifies 20  
896 Loci That Influence Adult Height.” *Nature Genetics* 40 (5): 575.



- 897 Weinschenk, Aaron C, and Christopher T Dawes. 2018. “Genes, Personality Traits, and the Sense  
898 of Civic Duty.” *American Politics Research* 46 (1): 47–76.
- 899 Wojcik, Genevieve, Mariaelisa Graff, Katherine K Nishimura, Ran Tao, Jeffrey Haessler,  
900 Christopher R Gignoux, Heather M Highland, et al. 2018. “The PAGE Study: How Genetic  
901 Diversity Improves Our Understanding of the Architecture of Complex Traits.” *BioRxiv*,  
902 188094.
- 903 Wood, Andrew R., Tonu Esko, Jian Yang, Sailaja Vedantam, Tune H. Pers, Stefan Gustafsson,  
904 Audrey Y. Chu, et al. 2014. “Defining the Role of Common Variation in the Genomic and  
905 Biological Architecture of Adult Human Height.” *Nature Genetics* 46 (11): 1173–86.  
906 <https://doi.org/10.1038/ng.3097>.
- 907 Yengo, Loic, Julia Sidorenko, Kathryn E Kemper, Zhili Zheng, Andrew R Wood, Michael N  
908 Weedon, Timothy M Frayling, et al. 2018. “Meta-Analysis of Genome-Wide Association  
909 Studies for Height and Body Mass Index In~ 700000 Individuals of European Ancestry.”  
910 *Human Molecular Genetics* 27 (20): 3641–49.
- 911 Young, Alexander I., Michael L. Frigge, Daniel F. Gudbjartsson, Gudmar Thorleifsson, Gyda  
912 Bjornsdottir, Patrick Sulem, Gisli Masson, Unnur Thorsteinsdottir, Kari Stefansson, and  
913 Augustine Kong. 2018. “Relatedness Disequilibrium Regression Estimates Heritability  
914 without Environmental Bias.” *Nature Genetics* 50 (9): 1304–10.  
915 <https://doi.org/10.1038/s41588-018-0178-9>.
- 916 Zhang, Ge, Jonas Bacelis, Candice Lengyel, Kari Teramo, Mikko Hallman, Øyvind Helgeland,  
917 Stefan Johansson, et al. 2015. “Assessing the Causal Relationship of Maternal Height on Birth  
918 Size and Gestational Age at Birth: A Mendelian Randomization Analysis.” *PLoS Medicine* 12  
919 (8): e1001865.
- 920 Zhou, Bin, James Bentham, Mariachiara Di Cesare, Honor Bixby, Goodarz Danaei, Melanie J  
921 Cowan, Christopher J Paciorek, et al. 2017. “Worldwide Trends in Blood Pressure from 1975  
922 to 2015: A Pooled Analysis of 1479 Population-Based Measurement Studies with 19·1  
923 Million Participants.” *The Lancet* 389 (10064): 37–55.
- 924
- 925
